# Supplementary material
Source: PubMed Central journal article supplement (PMC2625287)
Supplement: NIHMS60358-supplement-SI.pdf [file NIHMS60358-supplement-SI.pdf]

Supporting Information For

**Heterobimetallic Dioxygen Activation: Synthesis and Reactivity of Mixed Cu-Pd and Cu-Pt Bis( $\mu$ -oxo) Complexes**

John T. York,<sup>a</sup> Antoni Llobet,<sup>b</sup> Christopher J. Cramer<sup>a,\*</sup> and William B. Tolman<sup>a,\*</sup>

*Department of Chemistry, Center for Metals in Biocatalysis, and Supercomputer Institute, University of Minnesota, 207 Pleasant St. SE, Minneapolis, Minnesota 55455, and Institut Catala d'Investigacio Quimica (ICIQ), Campus Universitari de Tarragona, Av. Paisos Catalans 16, E-43007 Tarragona, Spain*

---

\* Authors to whom correspondence should be addressed. E-mail: [cramer@chem.umn.edu](mailto:cramer@chem.umn.edu), [tolman@chem.umn.edu](mailto:tolman@chem.umn.edu)

<sup>a</sup> University of Minnesota

<sup>b</sup> Universitat de Tarragona

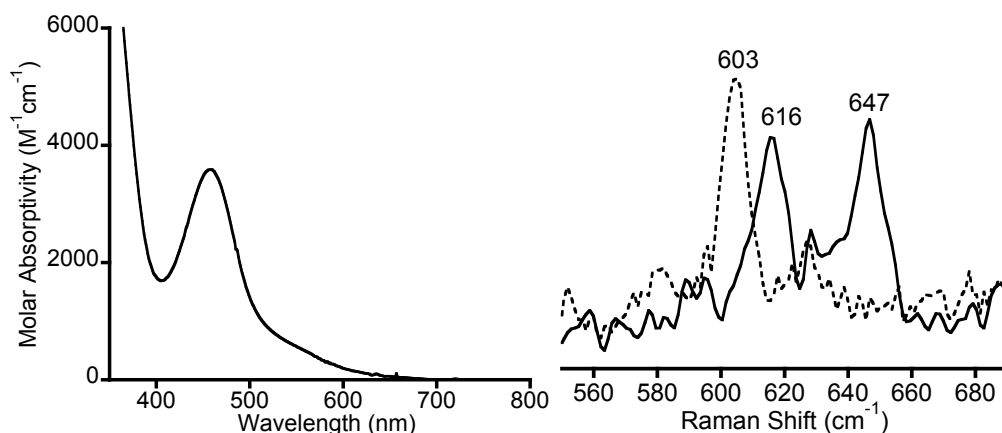

**Figure S1.** (left) UV-vis spectrum (-80 °C) and (right) resonance Raman spectra (-196 °C,  $^{16}\text{O}$  solid line,  $^{18}\text{O}$  dashed line) of  $[(\text{Me}_4\text{chd})\text{Cu}(\mu\text{-O})_2\text{Pt}(\text{PPh}_3)_2]\text{PF}_6$  in  $\text{CH}_2\text{Cl}_2$ .

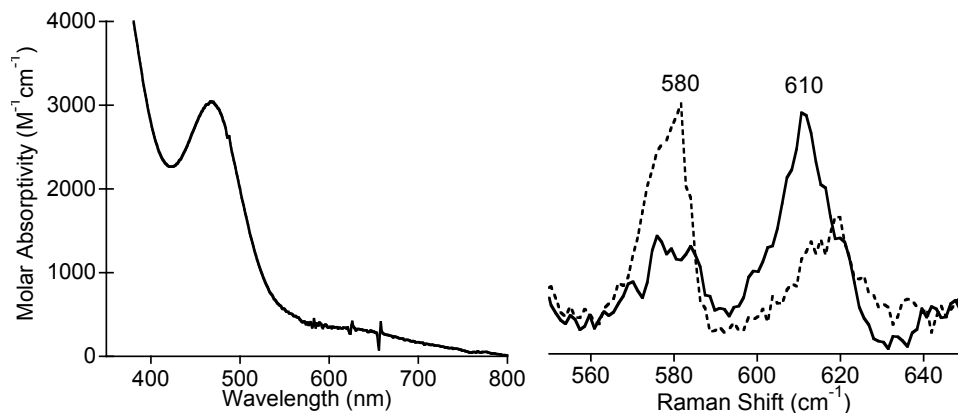

**Figure S2.** (left) UV-vis spectrum (-80 °C) and (right) resonance Raman spectra (-196 °C,  $^{16}\text{O}$  solid line,  $^{18}\text{O}$  dashed line) of  $[(\text{Me}_4\text{pda})\text{Cu}(\mu\text{-O})_2\text{Pd}(\text{PPh}_3)_2]\text{CF}_3\text{SO}_3$  in  $\text{CH}_2\text{Cl}_2$ .

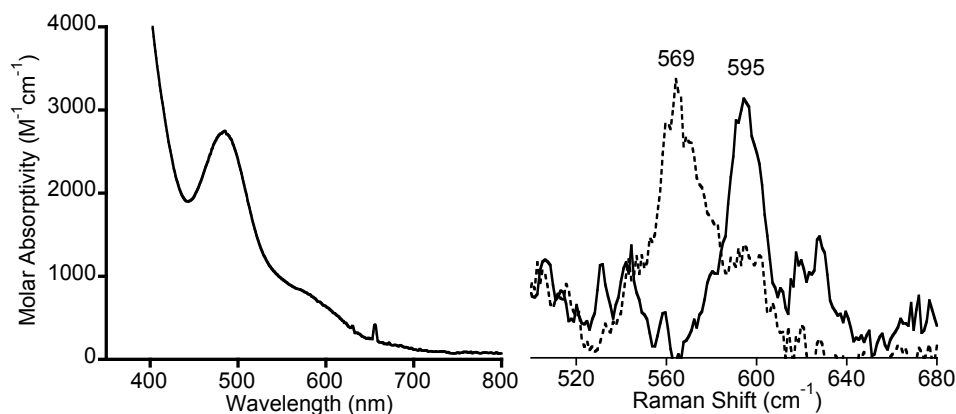

**Figure S3.** (left) UV-vis spectrum (-80 °C) and (right) resonance Raman spectra (-196 °C,  $^{16}\text{O}$  solid line,  $^{18}\text{O}$  dashed line) of  $[(\text{Me}_4\text{pda})\text{Cu}(\mu\text{-O})_2\text{Pt}(\text{PPh}_3)_2]\text{CF}_3\text{SO}_3$  in  $\text{CH}_2\text{Cl}_2$ .

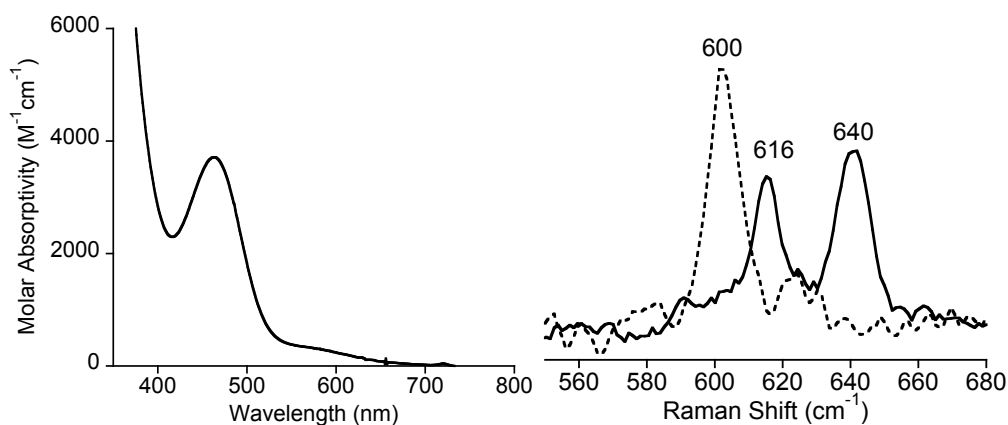

**Figure S4.** (left) UV-vis spectrum (-80 °C) and (right) resonance Raman spectra (-196 °C,  $^{16}\text{O}$  solid line,  $^{18}\text{O}$  dashed line) of  $[(\text{Me}_4\text{chd})\text{Cu}(\mu\text{-O})_2\text{Pd}(\text{PPh}_3)_2]\text{PF}_6$  in  $\text{CH}_2\text{Cl}_2$ .

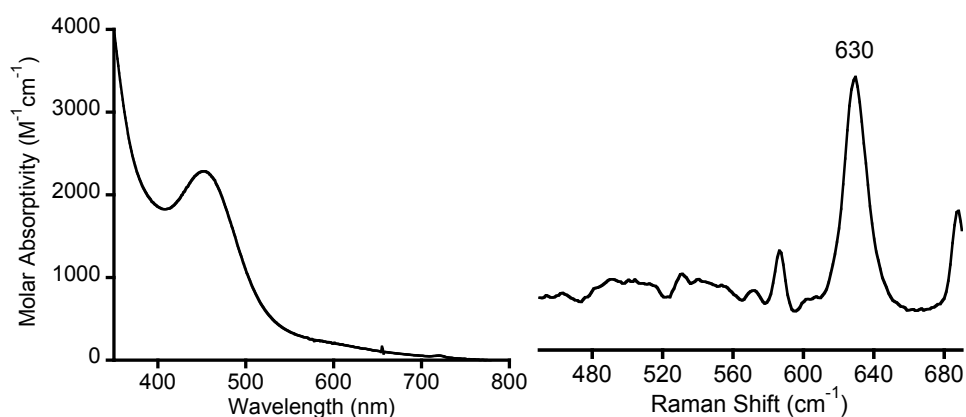

**Figure S5.** (left) UV-vis spectrum (-80 °C) and (right) resonance Raman spectra (-196 °C,  $^{16}\text{O}$  solid line,  $^{18}\text{O}$  dashed line) of  $[(\text{iPr}_3\text{tacn})\text{Cu}(\mu\text{-O})_2\text{Pd}(\text{PPh}_3)_2]\text{SbF}_6$  in  $\text{CH}_2\text{Cl}_2$ .

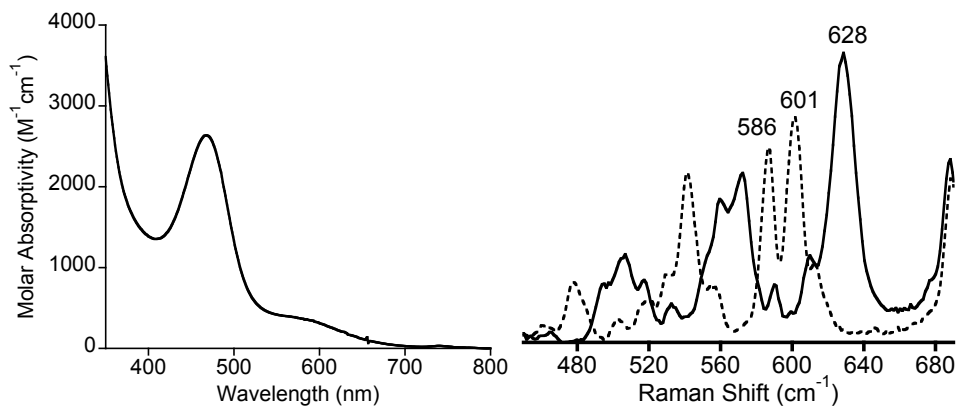

**Figure S6.** (left) UV-vis spectrum (-80 °C) and (right) resonance Raman spectra (-196 °C,  $^{16}\text{O}$  solid line,  $^{18}\text{O}$  dashed line) of  $[(\text{iPr}_3\text{tacn})\text{Cu}(\mu\text{-O})_2\text{Pt}(\text{PPh}_3)_2]\text{SbF}_6$  in  $\text{CH}_2\text{Cl}_2$ .

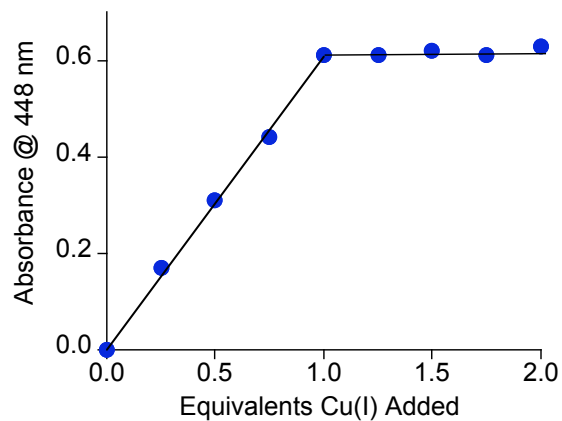

**Figure S7.** Plot showing results of spectrophotometric titration of  $(\text{PPh}_3)_2\text{PdO}_2$  with  $[(\text{L}^{\text{Me}_2})\text{Cu}(\text{NCCH}_3)]$  in THF at  $-80\text{ }^\circ\text{C}$ . Reproduced from the supporting information in ref. 1.

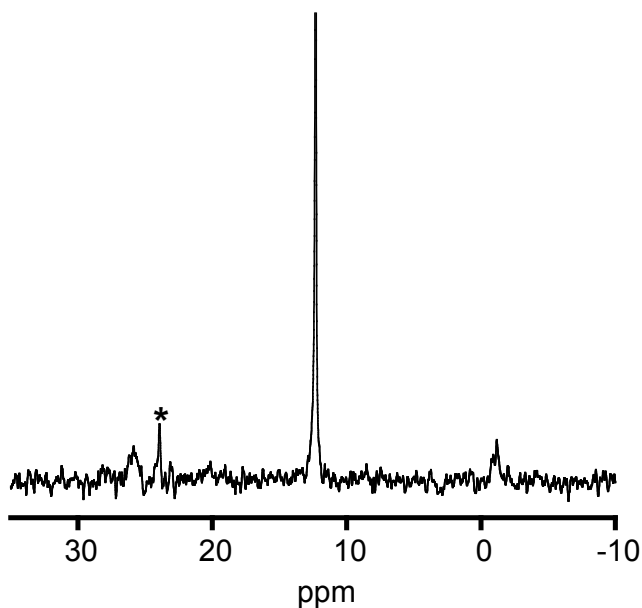

**Figure S8.**  $^{31}\text{P}\{^1\text{H}\}$  NMR spectrum of  $\text{L}^{\text{Me}_2}\text{Cu}(\mu\text{-O})_2\text{Pt}(\text{PPh}_3)_2$  in THF at  $-80\text{ }^\circ\text{C}$  (\* denotes  $\text{OPPh}_3$ ).

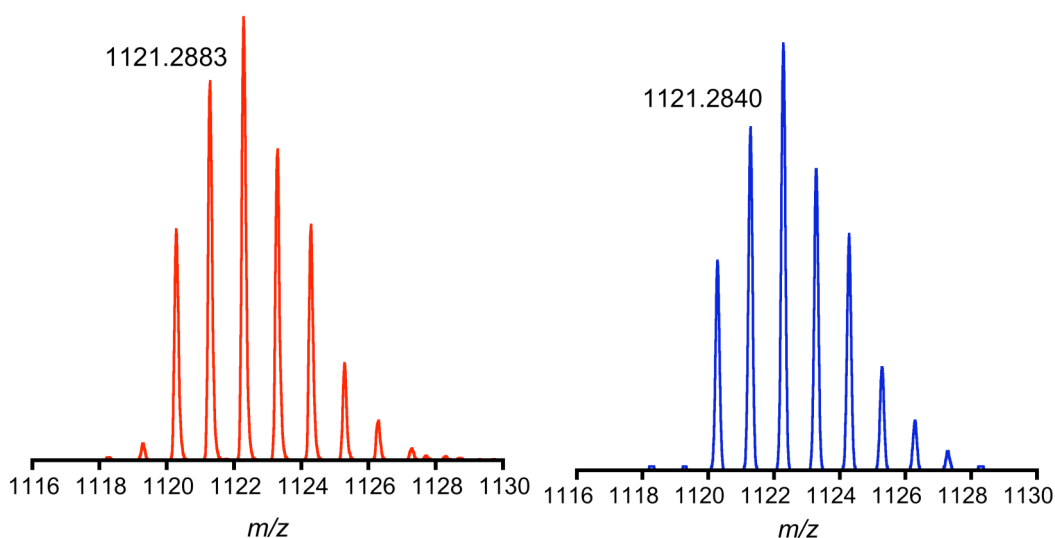

**Figure S9.** Experimental (left, red) and calculated (right, blue) isotope pattern for the parent ion of  $[\text{PtCuP}_2\text{N}_2\text{C}_{57}\text{H}_{57}\text{O}_2]^+$ , the product of the reaction of  $\text{L}^{\text{Me}_2}\text{Cu}(\mu\text{-O})_2\text{Pt}(\text{PPh}_3)_2$  with  $[\text{NH}_4][\text{PF}_6]$ .

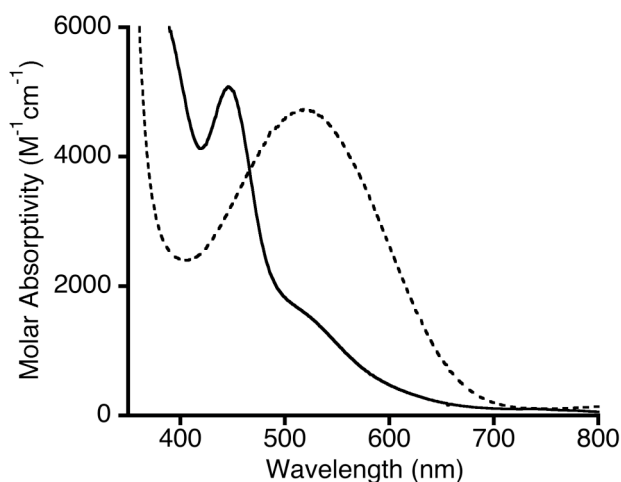

**Figure S10.** UV-vis spectrum ( $-80\text{ }^\circ\text{C}$ ) of  $\text{L}^{\text{Me}_2}\text{Cu}(\mu\text{-O})_2\text{Pt}(\text{PPh}_3)_2$  in  $\text{CH}_2\text{Cl}_2$  (solid line) and of the solution resulting immediately after reaction with  $\text{CO}_2$  (dashed line). The latter absorption featured decayed rapidly (several min).

**Complete reference 38:** *Gaussian 03*, Revision C.02, Frisch, M. J.; Trucks, G. W.; Schlegel, H. B.; Scuseria, G. E.; Robb, M. A.; Cheeseman, J. R.; Montgomery, Jr., J. A.; Vreven, T.; Kudin, K. N.; Burant, J. C.; Millam, J. M.; Iyengar, S. S.; Tomasi, J.; Barone, V.; Mennucci, B.; Cossi, M.; Scalmani, G.; Rega, N.; Petersson, G. A.; Nakatsuji, H.; Hada, M.; Ehara, M.; Toyota, K.; Fukuda, R.; Hasegawa, J.; Ishida, M.; Nakajima, T.; Honda, Y.; Kitao, O.; Nakai, H.; Klene, M.; Li, X.; Knox, J. E.; Hratchian, H. P.; Cross, J. B.; Bakken, V.; Adamo, C.; Jaramillo, J.; Gomperts, R.; Stratmann, R. E.; Yazyev, O.; Austin, A. J.; Cammi, R.; Pomelli, C.; Ochterski, J. W.; Ayala, P. Y.; Morokuma, K.; Voth, G. A.; Salvador, P.; Dannenberg, J. J.; Zakrzewski, V. G.; Dapprich, S.; Daniels, A. D.; Strain, M. C.; Farkas, O.; Malick, D. K.; Rabuck, A. D.;

Raghavachari, K.; Foresman, J. B.; Ortiz, J. V.; Cui, Q.; Baboul, A. G.; Clifford, S.; Cioslowski, J.; Stefanov, B. B.; Liu, G.; Liashenko, A.; Piskorz, P.; Komaromi, I.; Martin, R. L.; Fox, D. J.; Keith, T.; Al-Laham, M. A.; Peng, C. Y.; Nanayakkara, A.; Challacombe, M.; Gill, P. M. W.; Johnson, B.; Chen, W.; Wong, M. W.; Gonzalez, C.; Pople, J. A. Gaussian, Inc., Wallingford CT, 2004.

**Table S1.** Selected experimental and calculated bond distances and angles for [Cu<sup>III</sup>(H33m)].

|                          | Exp    | Calc   |
|--------------------------|--------|--------|
| Cu-C                     | 1.901  | 1.914  |
| Cu-N(trans) <sup>a</sup> | 2.002  | 2.067  |
| Cu-N(cis)                | 1.952  | 1.996  |
| Cu-N(cis)                | 1.960  | 1.996  |
| C-Cu-N(trans)            | 178.37 | 178.25 |
| C-Cu-N(cis)              | 81.69  | 82.61  |
| C-Cu-N(cis)              | 82.79  | 82.61  |
| N(trans)-Cu-N(cis)       | 99.73  | 97.19  |
| N(trans)-Cu-N(cis)       | 95.63  | 97.19  |
| N(cis)-Cu-N(cis)         | 157.24 | 160.18 |

<sup>a</sup> cis and trans is referred to the Cu-C bond.

## Cartesian coordinates for all theoretical structures.

1

|    |          |           |           |
|----|----------|-----------|-----------|
| O  | 0.000000 | 1.196275  | 0.000000  |
| O  | 0.000000 | -1.196275 | 0.000000  |
| Cu | 0.000000 | 0.000000  | 1.354954  |
| Cu | 0.000000 | 0.000000  | -1.354954 |
| N  | 0.000000 | 1.352829  | 2.650314  |
| N  | 0.000000 | -1.352829 | 2.650314  |
| N  | 0.000000 | 1.352829  | -2.650314 |
| N  | 0.000000 | -1.352829 | -2.650314 |
| C  | 0.000000 | 1.222039  | 3.959563  |
| C  | 0.000000 | -1.222039 | 3.959563  |
| C  | 0.000000 | 1.222039  | -3.959563 |
| C  | 0.000000 | -1.222039 | -3.959563 |
| H  | 0.000000 | 2.291734  | 2.265107  |
| H  | 0.000000 | -2.291734 | 2.265107  |
| H  | 0.000000 | 2.291734  | -2.265107 |
| H  | 0.000000 | -2.291734 | -2.265107 |
| H  | 0.000000 | 2.141829  | 4.551397  |
| H  | 0.000000 | -2.141829 | 4.551397  |
| H  | 0.000000 | 2.141829  | -4.551397 |
| H  | 0.000000 | -2.141829 | -4.551397 |
| C  | 0.000000 | 0.000000  | 4.644915  |
| C  | 0.000000 | 0.000000  | -4.644915 |
| H  | 0.000000 | 0.000000  | 5.728343  |
| H  | 0.000000 | 0.000000  | -5.728343 |

2

|    |           |           |           |
|----|-----------|-----------|-----------|
| Cu | -0.000071 | 1.362334  | 0.000000  |
| Pd | 0.000032  | -1.472657 | 0.000000  |
| O  | -0.000065 | 0.059668  | 1.265456  |
| O  | -0.000065 | 0.059668  | -1.265456 |
| N  | -0.000076 | 2.671146  | 1.347712  |
| N  | -0.000076 | 2.671146  | -1.347712 |
| C  | -0.000076 | 3.979707  | 1.221562  |
| C  | -0.000076 | 3.979707  | -1.221562 |
| C  | -0.000075 | 4.667806  | 0.000000  |
| H  | -0.000075 | 2.274991  | 2.282287  |
| H  | -0.000075 | 2.274991  | -2.282287 |
| P  | 0.000119  | -2.866932 | 1.828256  |
| P  | 0.000119  | -2.866932 | -1.828256 |
| H  | -0.000076 | 5.751327  | 0.000000  |
| H  | -0.000076 | 4.570522  | 2.142643  |
| H  | -0.000076 | 4.570522  | -2.142643 |
| H  | 1.059607  | -3.759363 | 2.107802  |
| H  | 1.059607  | -3.759363 | -2.107802 |
| H  | -1.059312 | -3.759418 | 2.107842  |
| H  | 0.000122  | -2.138175 | -3.031630 |
| H  | 0.000122  | -2.138175 | 3.031630  |
| H  | -1.059312 | -3.759418 | -2.107842 |



**3**

|    |           |           |           |
|----|-----------|-----------|-----------|
| Cu | -0.000013 | -1.626633 | 0.000000  |
| Pt | 0.000032  | 1.242743  | 0.000000  |
| O  | 0.000032  | -0.321591 | 1.264604  |
| O  | 0.000032  | -0.321591 | -1.264604 |
| N  | -0.000061 | -2.934067 | 1.345658  |
| N  | -0.000061 | -2.934067 | -1.345658 |
| C  | -0.000120 | -4.242732 | 1.221028  |
| C  | -0.000120 | -4.242732 | -1.221028 |
| C  | -0.000153 | -4.931450 | 0.000000  |
| H  | -0.000041 | -2.533958 | 2.278768  |
| H  | -0.000041 | -2.533958 | -2.278768 |
| P  | 0.000032  | 2.652885  | 1.773715  |
| P  | 0.000032  | 2.652885  | -1.773715 |
| H  | -0.000202 | -6.014929 | 0.000000  |
| H  | -0.000145 | -4.831991 | 2.142956  |
| H  | -0.000145 | -4.831991 | -2.142956 |
| H  | -1.063359 | 3.551278  | 2.016458  |
| H  | -1.063359 | 3.551278  | -2.016458 |
| H  | 1.063439  | 3.551254  | 2.016474  |
| H  | 0.000015  | 1.958753  | -2.998170 |
| H  | 0.000015  | 1.958753  | 2.998170  |
| H  | 1.063439  | 3.551254  | -2.016474 |

**4**

|    |          |           |           |
|----|----------|-----------|-----------|
| O  | 0.000000 | 1.230765  | 0.000000  |
| O  | 0.000000 | -1.230765 | 0.000000  |
| Cu | 0.000000 | 0.000000  | 1.398417  |
| Cu | 0.000000 | 0.000000  | -1.398417 |
| N  | 0.000000 | 1.391042  | 2.763321  |
| N  | 0.000000 | -1.391042 | 2.763321  |
| N  | 0.000000 | 1.391042  | -2.763321 |
| N  | 0.000000 | -1.391042 | -2.763321 |
| C  | 0.000000 | 1.237087  | 4.066444  |
| C  | 0.000000 | -1.237087 | 4.066444  |
| C  | 0.000000 | 1.237087  | -4.066444 |
| C  | 0.000000 | -1.237087 | -4.066444 |
| H  | 0.000000 | 2.345200  | 2.419943  |
| H  | 0.000000 | -2.345200 | 2.419943  |
| H  | 0.000000 | 2.345200  | -2.419943 |
| H  | 0.000000 | -2.345200 | -2.419943 |
| H  | 0.000000 | 2.139208  | 4.695674  |
| H  | 0.000000 | -2.139208 | 4.695674  |
| H  | 0.000000 | 2.139208  | -4.695674 |
| H  | 0.000000 | -2.139208 | -4.695674 |
| C  | 0.000000 | 0.000000  | 4.740640  |
| C  | 0.000000 | 0.000000  | -4.740640 |
| H  | 0.000000 | 0.000000  | 5.826914  |
| H  | 0.000000 | 0.000000  | -5.826914 |

**5**

|    |           |           |           |
|----|-----------|-----------|-----------|
| Cu | -1.274144 | -0.000002 | -0.000026 |
| Pd | 1.576870  | -0.000002 | -0.000044 |
| O  | 0.129374  | 1.357227  | -0.000252 |
| O  | 0.129369  | -1.357226 | 0.000216  |
| N  | -2.712208 | 1.391548  | 0.000132  |
| N  | -2.712208 | -1.391551 | -0.000132 |
| C  | -4.016011 | 1.238206  | 0.000132  |
| C  | -4.016011 | -1.238212 | -0.000066 |
| C  | -4.689416 | -0.000003 | 0.000044  |
| H  | -2.382410 | 2.352152  | 0.000188  |
| H  | -2.382407 | -2.352154 | -0.000178 |
| P  | 2.640559  | 2.018532  | 0.000049  |
| P  | 2.640579  | -2.018522 | 0.000054  |
| H  | -5.776281 | -0.000002 | 0.000071  |
| H  | -4.651193 | 2.137842  | 0.000214  |
| H  | -4.651192 | -2.137847 | -0.000102 |
| H  | 4.040455  | 2.348789  | -0.000309 |
| H  | 4.040482  | -2.348737 | 0.000157  |
| H  | 2.296998  | 2.877201  | -1.063093 |
| H  | 2.297293  | -2.877018 | -1.063289 |
| H  | 2.297575  | 2.876778  | 1.063707  |
| H  | 2.297351  | -2.876952 | 1.063511  |

**6**

|    |           |           |           |
|----|-----------|-----------|-----------|
| Cu | -1.609543 | 0.000000  | -0.000042 |
| Pt | 1.300464  | 0.000000  | -0.000039 |
| O  | -0.186796 | -1.329041 | -0.000028 |
| O  | -0.186796 | 1.329041  | -0.000250 |
| N  | -3.044396 | -1.393132 | -0.000150 |
| N  | -3.044397 | 1.393131  | 0.000207  |
| C  | -4.348197 | -1.238529 | -0.000065 |
| C  | -4.348198 | 1.238527  | 0.000213  |
| C  | -5.020924 | -0.000001 | 0.000099  |
| H  | -2.716832 | -2.354542 | -0.000245 |
| H  | -2.716834 | 2.354542  | 0.000273  |
| P  | 2.571490  | -1.865641 | 0.000183  |
| P  | 2.571484  | 1.865643  | 0.000019  |
| H  | -6.107782 | -0.000002 | 0.000137  |
| H  | -4.984102 | -2.137627 | -0.000130 |
| H  | -4.984103 | 2.137625  | 0.000322  |
| H  | 3.998897  | -1.927104 | -0.000286 |
| H  | 3.998892  | 1.927121  | 0.000940  |
| H  | 2.380942  | -2.785340 | 1.058173  |
| H  | 2.379977  | 2.785759  | 1.057446  |
| H  | 2.380088  | -2.785845 | -1.057181 |
| H  | 2.381028  | 2.785439  | -1.057901 |

7

|    |           |           |           |
|----|-----------|-----------|-----------|
| O  | -1.399766 | -0.067542 | 0.000000  |
| O  | 1.085541  | 0.111850  | 0.000000  |
| Cu | -0.078649 | -0.020550 | 1.381703  |
| Cu | -0.078649 | -0.020550 | -1.381703 |
| N  | -1.311900 | 0.021395  | 2.787991  |
| N  | 1.359747  | -0.167554 | 2.512793  |
| N  | -1.311900 | 0.021395  | -2.787991 |
| N  | 1.359747  | -0.167554 | -2.512793 |
| C  | -1.043793 | 0.009317  | 4.081340  |
| C  | 1.369041  | 0.058641  | 3.812686  |
| C  | -1.043793 | 0.009317  | -4.081340 |
| C  | 1.369041  | 0.058641  | -3.812686 |
| H  | -2.260956 | -0.241370 | 2.531334  |
| H  | 2.231019  | -0.084895 | 1.993672  |
| H  | -2.260956 | -0.241370 | -2.531334 |
| H  | 2.231019  | -0.084895 | -1.993672 |
| H  | -1.893076 | -0.092428 | 4.760243  |
| H  | 2.354361  | 0.171004  | 4.270469  |
| H  | -1.893076 | -0.092428 | -4.760243 |
| H  | 2.354361  | 0.171004  | -4.270469 |
| C  | 0.237777  | 0.117434  | 4.629428  |
| C  | 0.237777  | 0.117434  | -4.629428 |
| H  | 0.357655  | 0.205129  | 5.701886  |
| H  | 0.357655  | 0.205129  | -5.701886 |
| H  | -1.928749 | 0.744066  | 0.000000  |

8

|    |           |           |           |
|----|-----------|-----------|-----------|
| Cu | 1.396845  | -0.101236 | -0.131274 |
| Pd | -1.467969 | -0.032991 | -0.082741 |
| O  | 0.066078  | -1.466870 | -0.284930 |
| O  | 0.090195  | 1.129885  | -0.410091 |
| N  | 2.776915  | -1.362283 | -0.028121 |
| N  | 2.535021  | 1.299600  | 0.208330  |
| C  | 4.058042  | -1.139919 | 0.193519  |
| C  | 3.854158  | 1.278062  | 0.219956  |
| C  | 4.644869  | 0.128315  | 0.251424  |
| H  | 2.451737  | -2.318454 | 0.091189  |
| H  | 2.051240  | 2.185489  | 0.085600  |
| P  | -3.200434 | -1.547125 | 0.305186  |
| P  | -2.575614 | 1.941436  | 0.113420  |
| H  | 5.719156  | 0.220258  | 0.348405  |
| H  | 4.694827  | -2.015978 | 0.334691  |
| H  | 4.345507  | 2.253522  | 0.234720  |
| H  | -4.238657 | -1.671369 | -0.636453 |
| H  | -3.976567 | 2.045049  | 0.044667  |
| H  | -3.963888 | -1.441164 | 1.482211  |
| H  | -2.171433 | 2.871262  | -0.854518 |
| H  | -2.784385 | -2.886634 | 0.399654  |
| H  | -2.318637 | 2.635600  | 1.306088  |
| H  | 0.073742  | -1.802896 | -1.193006 |

## 9

|    |           |           |           |
|----|-----------|-----------|-----------|
| Cu | 1.661853  | -0.087367 | -0.129197 |
| Pt | -1.239070 | -0.012278 | -0.066589 |
| O  | 0.307141  | -1.443717 | -0.303717 |
| O  | 0.354918  | 1.138873  | -0.421895 |
| N  | 3.042818  | -1.349838 | -0.026826 |
| N  | 2.791585  | 1.313541  | 0.231102  |
| C  | 4.322593  | -1.124157 | 0.198642  |
| C  | 4.110907  | 1.294317  | 0.235673  |
| C  | 4.904720  | 0.146593  | 0.261291  |
| H  | 2.722895  | -2.307895 | 0.092758  |
| H  | 2.304268  | 2.196819  | 0.101911  |
| P  | -2.891250 | -1.560868 | 0.341717  |
| P  | -2.462353 | 1.862545  | 0.143172  |
| H  | 5.978827  | 0.241739  | 0.357602  |
| H  | 4.962850  | -1.997664 | 0.339951  |
| H  | 4.599968  | 2.271000  | 0.250380  |
| H  | -3.924403 | -1.742367 | -0.596464 |
| H  | -3.562975 | 2.040778  | -0.711652 |
| H  | -3.650641 | -1.474298 | 1.523037  |
| H  | -1.695008 | 3.009922  | -0.104621 |
| H  | -2.402396 | -2.874423 | 0.446696  |
| H  | -3.043162 | 2.149575  | 1.390152  |
| H  | 0.300969  | -1.754708 | -1.221102 |

## 10

|    |           |           |           |
|----|-----------|-----------|-----------|
| O  | 0.116933  | -1.413775 | 0.114192  |
| O  | 0.094782  | 1.104200  | 0.110700  |
| Cu | 1.429255  | -0.073878 | 0.047986  |
| Cu | -1.427780 | -0.027946 | 0.030019  |
| N  | 2.863191  | -1.322124 | -0.014313 |
| N  | 2.581869  | 1.369464  | -0.067531 |
| N  | -2.828175 | -1.362823 | -0.095894 |
| N  | -2.706257 | 1.434778  | 0.034832  |
| C  | 4.153384  | -1.058923 | -0.084360 |
| C  | 3.895331  | 1.369151  | -0.090426 |
| C  | -4.129636 | -1.132000 | -0.140310 |
| C  | -4.017301 | 1.333200  | -0.012674 |
| H  | 2.599452  | -2.299722 | -0.082135 |
| H  | 2.069267  | 2.245489  | -0.062235 |
| H  | -2.576956 | -2.342950 | -0.179365 |
| H  | -2.341536 | 2.380706  | 0.079069  |
| H  | 4.838141  | -1.909949 | -0.142637 |
| H  | 4.381406  | 2.348262  | -0.118652 |
| H  | -4.794795 | -1.998185 | -0.227751 |
| H  | -4.601730 | 2.260212  | 0.004278  |
| C  | 4.706822  | 0.226936  | -0.094491 |
| C  | -4.738158 | 0.128642  | -0.089083 |
| H  | 5.783275  | 0.342785  | -0.131956 |
| H  | -5.821145 | 0.179063  | -0.126640 |
| H  | 0.131063  | -1.813308 | 0.995164  |

**11**

|    |           |           |           |
|----|-----------|-----------|-----------|
| Cu | -1.391282 | -0.082252 | -0.067780 |
| Pd | 1.562885  | -0.032004 | -0.055833 |
| O  | 0.098190  | -1.512946 | -0.205299 |
| O  | 0.047242  | 1.195957  | -0.171312 |
| N  | -2.758313 | -1.457668 | 0.100203  |
| N  | -2.736452 | 1.326553  | -0.039930 |
| C  | -4.064613 | -1.278882 | 0.181644  |
| C  | -4.041737 | 1.185960  | 0.046043  |
| C  | -4.720964 | -0.040820 | 0.146100  |
| H  | -2.457627 | -2.424672 | 0.173528  |
| H  | -2.398443 | 2.281934  | -0.095486 |
| P  | 3.305447  | -1.549515 | 0.150964  |
| P  | 2.287006  | 2.093057  | 0.126097  |
| H  | -5.803656 | -0.027752 | 0.214120  |
| H  | -4.694308 | -2.169627 | 0.288627  |
| H  | -4.655996 | 2.094145  | 0.043785  |
| H  | 3.263643  | -2.417984 | 1.262167  |
| H  | 3.648995  | 2.482476  | 0.265358  |
| H  | 4.660343  | -1.165941 | 0.261394  |
| H  | 1.759455  | 2.801024  | 1.213441  |
| H  | 3.477843  | -2.534499 | -0.846728 |
| H  | 1.941850  | 2.916244  | -0.952437 |
| H  | 0.089350  | -1.874825 | -1.101463 |

**12**

|    |           |           |           |
|----|-----------|-----------|-----------|
| Cu | -1.691856 | -0.052941 | -0.075734 |
| Pt | 1.309275  | -0.024145 | -0.047502 |
| O  | -0.168373 | -1.484001 | -0.232184 |
| O  | -0.240558 | 1.185726  | -0.206136 |
| N  | -3.053674 | -1.430387 | 0.097495  |
| N  | -3.033224 | 1.357599  | -0.024356 |
| C  | -4.359269 | -1.248964 | 0.195697  |
| C  | -4.336778 | 1.217696  | 0.076445  |
| C  | -5.014737 | -0.010499 | 0.176809  |
| H  | -2.757721 | -2.399633 | 0.160565  |
| H  | -2.691461 | 2.311730  | -0.079386 |
| P  | 3.003315  | -1.545980 | 0.191825  |
| P  | 2.252332  | 1.996036  | 0.152982  |
| H  | -6.096544 | 0.002218  | 0.257900  |
| H  | -4.989145 | -2.139410 | 0.303561  |
| H  | -4.951119 | 2.125835  | 0.087354  |
| H  | 3.853255  | -1.506918 | 1.321154  |
| H  | 1.811104  | 2.749963  | 1.250812  |
| H  | 4.016994  | -1.704950 | -0.782768 |
| H  | 1.968270  | 2.869446  | -0.905910 |
| H  | 2.603438  | -2.894760 | 0.287734  |
| H  | 3.646175  | 2.207988  | 0.272702  |
| H  | -0.163176 | -1.807421 | -1.143502 |

13

|    |           |           |           |
|----|-----------|-----------|-----------|
| Cu | -1.907095 | -0.273520 | -0.046666 |
| Cu | 0.727635  | -1.292340 | -0.058930 |
| O  | -0.161818 | 0.346286  | -0.322232 |
| O  | -0.994257 | -1.816434 | 0.197787  |
| N  | -2.784096 | 1.390731  | -0.347613 |
| N  | -3.523193 | -1.164537 | 0.301200  |
| C  | -4.081380 | 1.621963  | -0.280013 |
| C  | -4.738642 | -0.665882 | 0.299907  |
| C  | -5.061503 | 0.671865  | 0.030714  |
| H  | -2.215103 | 2.191423  | -0.596261 |
| H  | -3.409557 | -2.151750 | 0.504695  |
| H  | -6.100786 | 0.977685  | 0.057824  |
| H  | -4.417879 | 2.642747  | -0.486410 |
| H  | -5.559194 | -1.353715 | 0.526467  |
| H  | 0.241586  | 1.393956  | -0.381182 |
| C  | 0.755819  | 2.760408  | -0.484436 |
| H  | -0.110434 | 3.179581  | -1.006012 |
| C  | 1.971922  | 2.633107  | -1.277286 |
| C  | 3.207309  | 2.628624  | -0.716376 |
| C  | 3.431227  | 2.859895  | 0.760863  |
| C  | 2.156670  | 3.189509  | 1.500432  |
| C  | 0.941782  | 3.160438  | 0.911973  |
| H  | 1.870528  | 2.492529  | -2.353211 |
| H  | 4.089642  | 2.510858  | -1.345264 |
| H  | 3.911479  | 1.973595  | 1.218982  |
| H  | 2.248507  | 3.461466  | 2.550889  |
| H  | 0.055630  | 3.406809  | 1.496041  |
| H  | 4.172387  | 3.668182  | 0.903058  |
| N  | 2.475094  | -0.622917 | -0.375670 |
| N  | 1.347523  | -3.031263 | 0.277049  |
| C  | 3.598157  | -1.307551 | -0.315167 |
| C  | 2.590626  | -3.461735 | 0.267243  |
| C  | 3.712782  | -2.671626 | -0.009016 |
| H  | 2.575189  | 0.364838  | -0.618589 |
| H  | 0.613473  | -3.698128 | 0.489542  |
| H  | 4.696182  | -3.126761 | 0.010107  |
| H  | 4.522937  | -0.760020 | -0.523581 |
| H  | 2.752446  | -4.520372 | 0.492972  |

14

|    |           |           |           |
|----|-----------|-----------|-----------|
| Cu | 0.570984  | 1.370380  | -0.081326 |
| Pd | -1.950486 | -0.119113 | -0.044636 |
| O  | 0.043301  | -0.417333 | -0.345515 |
| O  | -1.222595 | 1.699352  | 0.162810  |
| N  | 2.409404  | 0.965188  | -0.353597 |
| N  | 0.946356  | 3.195978  | 0.216931  |
| C  | 3.423412  | 1.801628  | -0.297739 |
| C  | 2.112047  | 3.804441  | 0.210706  |
| C  | 3.340423  | 3.177034  | -0.031353 |
| H  | 2.644685  | -0.009226 | -0.558687 |
| H  | 0.117976  | 3.750827  | 0.405462  |
| P  | -2.534845 | -2.338498 | -0.345370 |
| P  | -3.906912 | 0.966093  | 0.385423  |
| H  | 4.249275  | 3.767403  | -0.013790 |
| H  | 4.419484  | 1.383201  | -0.475770 |
| H  | 2.117567  | 4.881143  | 0.410080  |
| H  | -3.880187 | -2.763206 | -0.259395 |
| H  | -5.193184 | 0.379065  | 0.421551  |
| H  | -1.981141 | -3.315225 | 0.509183  |
| H  | -4.188152 | 2.039186  | -0.478494 |
| H  | -2.226640 | -2.959698 | -1.574072 |
| H  | -3.953193 | 1.646539  | 1.615353  |
| H  | 0.560017  | -1.444525 | -0.405846 |
| C  | 1.212795  | -2.712645 | -0.516071 |
| H  | 0.481863  | -3.281795 | -1.099845 |
| C  | 1.417330  | -3.155916 | 0.871230  |
| C  | 2.583756  | -2.988940 | 1.526913  |
| C  | 3.803887  | -2.372076 | 0.880705  |
| C  | 3.619451  | -2.149010 | -0.605464 |
| C  | 2.437016  | -2.358673 | -1.234093 |
| H  | 0.573564  | -3.608225 | 1.394167  |
| H  | 2.677672  | -3.302558 | 2.565864  |
| H  | 4.054318  | -1.418076 | 1.383916  |
| H  | 4.499097  | -1.863595 | -1.182961 |
| H  | 2.370801  | -2.206246 | -2.311635 |
| H  | 4.689681  | -3.010082 | 1.055125  |

## 15

|    |           |           |           |
|----|-----------|-----------|-----------|
| Cu | -0.949537 | -1.354926 | -0.081779 |
| Pt | 1.691814  | -0.008734 | -0.033843 |
| O  | -0.292611 | 0.394388  | -0.362714 |
| O  | 0.824145  | -1.784381 | 0.183730  |
| N  | -2.754103 | -0.829205 | -0.378788 |
| N  | -1.451798 | -3.146248 | 0.238509  |
| C  | -3.823758 | -1.593167 | -0.320954 |
| C  | -2.656259 | -3.673551 | 0.228175  |
| C  | -3.836638 | -2.967231 | -0.035988 |
| H  | -2.919028 | 0.158666  | -0.593495 |
| H  | -0.664098 | -3.752310 | 0.444074  |
| P  | 2.393486  | 2.141675  | -0.366601 |
| P  | 3.642095  | -1.033121 | 0.409254  |
| H  | -4.783766 | -3.494025 | -0.019252 |
| H  | -4.787771 | -1.110371 | -0.512117 |
| H  | -2.737966 | -4.744259 | 0.442893  |
| H  | 3.769153  | 2.464926  | -0.332969 |
| H  | 4.719410  | -0.999136 | -0.502575 |
| H  | 1.941055  | 3.159857  | 0.499678  |
| H  | 3.481984  | -2.421051 | 0.560847  |
| H  | 2.084283  | 2.767060  | -1.592899 |
| H  | 4.366406  | -0.733354 | 1.583014  |
| H  | -0.702483 | 1.448010  | -0.416892 |
| C  | -1.264627 | 2.796936  | -0.515289 |
| H  | -0.500734 | 3.318339  | -1.099873 |
| C  | -1.428756 | 3.228159  | 0.878966  |
| C  | -2.594096 | 3.104931  | 1.547553  |
| C  | -3.847887 | 2.551005  | 0.908500  |
| C  | -3.693706 | 2.348942  | -0.584496 |
| C  | -2.508641 | 2.514741  | -1.224434 |
| H  | -0.559192 | 3.635010  | 1.396840  |
| H  | -2.661069 | 3.408337  | 2.591529  |
| H  | -4.129210 | 1.598366  | 1.398143  |
| H  | -4.593630 | 2.122561  | -1.156811 |
| H  | -2.462588 | 2.381645  | -2.305545 |
| H  | -4.704139 | 3.221022  | 1.108588  |



**Table S2.** Dichloromethane solvation free energies for **1-6**.

| Complex  | $\Delta G_{\text{solv}}$ (Kcal/mol) |
|----------|-------------------------------------|
| <b>1</b> | -14.2                               |
| <b>2</b> | -10.5                               |
| <b>3</b> | -10.9                               |
| <b>4</b> | -59.5                               |
| <b>5</b> | -50.9                               |
| <b>6</b> | -54.5                               |

**Table S3.** Aqueous solvation free energies for **1-3** and **7-9**.

| Complex  | $\Delta G_{\text{solv}}$ (Kcal/mol) |
|----------|-------------------------------------|
| <b>1</b> | -14.3                               |
| <b>2</b> | -9.4                                |
| <b>3</b> | -10.4                               |
| <b>7</b> | -53.0                               |
| <b>8</b> | -41.0                               |
| <b>9</b> | -41.8                               |

- 
- (1) Aboeella, N. W.; York, J. T.; Reynolds, A. M.; Fujita, K.; Kinsinger, C. R.; Cramer, C. J.; Riordan, C. G.; Tolman, W. B., *Chem. Commun.* **2004**, 1716-1717.
